# Supplementary material for: High microphone signal-to-noise ratio enhances acoustic sampling of wildlife
Source: PeerJ. 2020 Oct 20;8:e9955. doi: 10.7717/peerj.9955 (PMC7585376; doi:10.7717/peerj.9955)
Supplement: Supplemental Information 4 [file peerj-08-9955-s009.csv]

Model	Code	Type	Format	Manufacturer	Comments	Acoustic_vent_loss_dB	Specifications	SNR_specified_1kHz_dB	Sensitivity_specified_dBV	Amplification_recorder_dB	2.5V_bias
POM-1345P-C3310-R	A	electret condenser	capsule	PUI Audio		1	http://www.puiaudio.com/pdf/POM-1345P-C3310-R.pdf	55	-45	60	On
POM-2735P-R	B	electret condenser	capsule	PUI Audio		1	http://www.puiaudio.com/pdf/POM-2735P-R.pdf	60	-35	48	On
ROM-2235P-HD-R	C	electret condenser	capsule	PUI Audio		0	http://www.puiaudio.com/pdf/ROM-2235P-HD-R.pdf	68	-35	48	On
POM-2730L-HD-R	D	electret condenser	capsule	PUI Audio		0	http://www.puiaudio.com/pdf/POM-2730L-HD-R.pdf	74	-30	48	On
AOM-5024L-HD-R	E	electret condenser	capsule	PUI Audio		0	http://www.puiaudio.com/pdf/AOM-5024L-HD-R.pdf	80	-24	36	On
ICS-40720	F	electret condenser	MEMS	Invensense		0	https://www.invensense.com/wp-content/uploads/2015/02/DS-000045-v1.3-ICS-40720.pdf	70	-38	48	Off
WM-61A	G	electret condenser	capsule	Panasonic	capsule from SMX-II microphone from Wildlife acoustics (prior to 2014), used at least 4 years in the field	1	https://media.digikey.com/pdf/Data%20Sheets/Panasonic%20Electronic%20Components/WM-61A.pdf	62	-35	48	On
PMM-3738-VM1000-R	H	piezoelectric	MEMS	Vesper		0	http://www.puiaudio.com/pdf/PMM-3738-VM1000-R.pdf	62	-38	48	Off
SPM0404UD5	I	electret condenser	MEMS	Knowles	capsule from SMX-US microphone from Wildlife acoustics, used at least ? years in the field	1	https://media.digikey.com/pdf/Data%20Sheets/Knowles%20Acoustics%20PDFs/SPM0404UD5.pdf	59	-42	48	On
SPU0410LR5H-QB	J	electret condenser	MEMS	Knowles	capsule from BIO-SMX-US microphones from Biotope, used at least ? years in the field	0	https://media.digikey.com/pdf/Data%20Sheets/Knowles%20Acoustics%20PDFs/SPU0410LR5H-QB_RevH_3-27-13.pdf	63	-38	48	Off
FG-23629-C36	K	electret condenser	capsule	Knowles	capsule from SMX-U1 microphone from Wildlife acoustics, used at least ? years in the field, can only be used for ultrasound because of in-built high-pass filter at 5kHz	1	https://media.digikey.com/pdf/Data%20Sheets/Knowles%20Acoustics%20PDFs/FG-23629-D65_Dwg.pdf	66	-53	12	On
EM258	L	electret condenser	capsule	Primo	capsule from our repaired SMX-II microphones	1	http://www.primomic.de/pdf/EM258.pdf	74	-32	48	On
